# Supplementary material for: DNA Methylation Analysis in the Intestinal Epithelium—Effect of Cell Separation on Gene Expression and Methylation Profile
Source: PubMed Central journal article supplement (PMC3568120; doi:10.1371/journal.pone.0055636), 2013-02-08
Supplement: pone.0055636.s001.pdf [file pone.0055636.s001.pdf]

| <b>Gene</b>                   | <b>Primer name</b> | <b>Primers (5'-3')</b> |
|-------------------------------|--------------------|------------------------|
| <b>IL10</b>                   | IL10_218for        | tgcaccaggggaactgccca   |
|                               | IL10_218rev        | gccttggcctcccagagtgc   |
|                               | IL10_50for         | cgggcacagtggtcatgcc    |
|                               | IL10_50rev         | gccttggcctcccagagtgc   |
| <b>PECAM1</b>                 | PECAM1_131for      | gcccagccgtaattctattc   |
|                               | PECAM1_131rev      | aggaagtagggggcaaagag   |
|                               | PECAM1_90for       | gggagaagtgaccagagcaa   |
|                               | PECAM1_90rev       | catgactcgctcagcagaag   |
| <b>TLR4</b>                   | TRL4_for           | ttcaccaagcccaggcagaggt |
|                               | TLR4_rev           | ggcgcgaggcagacatcatcc  |
| <b>iNOS</b>                   | NOS_for            | ggctgccagtgtgtcataa    |
|                               | NOS_rev            | tctgagccttctcaaagagga  |
| <b>DNMT3</b>                  | DNMT3a_for         | ttggccctgtagagcagagt   |
|                               | DNMT3a_rev         | ctgcagttctccgacctc     |
|                               | DNMT3a02_for       | cctggccttatgggtaggtt   |
|                               | DNMT3a02_rev       | cggggaggcatacttcaact   |
|                               | DNMT3a03_for       | ccgggttgaaaagagtgaa    |
|                               | DNMT3a03_rev       | agctgaagctgcctccaac    |
| <b>NOD1</b>                   | NOD1_for           | cgctgggtaggcacttttac   |
|                               | NOD1_rev           | ggaactggctgcgactacag   |
| <b>TGF-<math>\beta</math></b> | TGFb1_for          | aagaccaccaccttctggt    |
|                               | TGFb1_rev          | gaggtcctcagggagaagg    |
| <b>HSPA1A</b>                 | HSPA1A_for         | ccctgctcagaactctccag   |
|                               | HSPA1A_rev         | ccgacccttctgtcaatta    |
