# Supplementary material for: DNA Methylation Analysis in the Intestinal Epithelium—Effect of Cell Separation on Gene Expression and Methylation Profile
Source: PubMed Central journal article supplement (PMC3568120; doi:10.1371/journal.pone.0055636), 2013-02-08
Supplement: pone.0055636.s002.pdf [file pone.0055636.s002.pdf]

| Gene          | Assay Name                  | Sequence to Analyse                                         | No.of CpG | Primers (5'-3')                                                                                   |
|---------------|-----------------------------|-------------------------------------------------------------|-----------|---------------------------------------------------------------------------------------------------|
| <b>NOD1</b>   | Hs_NOD1_01_PM<br>(Qiagen)   | CGCRCAGGGCCGAGTGGAC<br>AGGCCCAAGTTCG                        | 3         | included in the assay                                                                             |
| <b>DNMT3A</b> | Hs_DNMT3A_01_PM<br>(Qiagen) | CGCGCCGCAACCCCCAGCCA<br>GGTGCCGCCGCGG                       | 6         | included in the assay                                                                             |
|               | Hs_DNMT3A_02_PM<br>(Qiagen) | CGGGGGCGGGGAGGCGGC<br>AGGGCCGGTGGGAGGATCT<br>CCG            | 5         | included in the assay                                                                             |
|               | Hs_DNMT3A_03_PM<br>(Qiagen) | TTACCACTGCCCGGGCTCCC<br>GGCCGGCTGCTCTTCCTGTC<br>CCCCGAGGGCG | 5         | included in the assay                                                                             |
| <b>HSPA1A</b> | Hs_HSPA1A_01_PM<br>(Qiagen) | CGATGCTGACCGCCTGCGCT<br>TCAGCG                              | 4         | included in the assay                                                                             |
|               | Hs_HSPA1A_02_PM<br>(Qiagen) | TCGTACGGAGACCCGCCTT<br>TTCCCTTCTGAGCCAATCAC<br>CGAGCTCG     | 5         | included in the assay                                                                             |
| <b>TGFB1</b>  | Hs_TGFB1_01_PM<br>(Qiagen)  | TCAGTATCCCACGGAAATAA<br>CCTAGATGGGCGCG                      | 3         | included in the assay                                                                             |
| <b>EPCAM</b>  | Hs_EPCAM_03_PM<br>(Qiagen)  | GCAGGGAACGGAGTGGCCA<br>CGTCCAGGTTTCTGCGGCC<br>ACCGAACCGG    | 5         | included in the assay                                                                             |
| <b>IL10</b>   | IL 10-145                   | CGGGAAACCTTGATTGT                                           | 1         | fwd: AGAAGGAGGAGTTTTAAGGAGAAA<br>rvs: (Biotin)TCATTCATTAATAAACCAATCA<br>seq: AGGAGAAAAAATTTTGTGT  |
|               | IL 10-355                   | CGCACAGAACAGCTGTT                                           | 1         | fwd: GAATACGCGAATGAGAATTTATAG<br>rvs: (Biotin)TTTCTAATAAACCACTATTCTA<br>seq: TTTATAGTTGAGGGTTTTTG |
|               | IL 10-387                   | CGCGAATGASAACCCACAGC<br>TGAGGGCCTCTGCGC                     | 3         | fwd: TGTATTTTGAATGGGTAATTTG<br>rvs: (Biotin)AAAACCTCAACTATAAATTCTCA<br>seq: TATTGTGATTTAGGAATA    |
|               | IL 10-408                   | ACGTCACTGTGACCTAGGAA<br>CACGCGAA                            | 3         | fwd: TGTATTTTGAATGGGTAATTTG<br>rvs: (Biotin)AAAACCTCAACTATAAATTCTCA<br>seq: GGAATGGGTAATTTGTTT    |
